# Supplementary material for: Contrasting Geographical Distributions as a Result of Thermal Tolerance and Long-Distance Dispersal in Two Allegedly Widespread Tropical Brown Algae
Source: PubMed Central journal article supplement (PMC3266907; doi:10.1371/journal.pone.0030813), 2012-01-26
Supplement: pone.0030813.s003.pdf [file pone.0030813.s003.pdf]

Table S1. Specimens used in the molecular analysis with indication of collecting data and Genbank accession numbers of the sequences used (see Table S2 for multiple accession numbers of sequences related to a single specimen). In the first column, (●) indicates specimens used for the species delimitation analyses and (○) indicates the specimens used for the multigene phylogenetic analyses.

|     | <b>Taxon</b>                      | <b>Collector</b>                           | <b>Locality</b>                                  | <b>Latitude</b> | <b>Longitude</b> | <b>Id number</b> | <b>Accession no.</b>       |
|-----|-----------------------------------|--------------------------------------------|--------------------------------------------------|-----------------|------------------|------------------|----------------------------|
| ○   | <i>Canistrocarpus cervicornis</i> | Tronholm A., Sansón M., Afonso-Carrillo J. | Spain: Canary Islands: Tenerife: Punta Hidalgo   | 28.578          | -16.328          | D192             | (See Table S2)             |
| ○   | <i>Canistrocarpus cervicornis</i> | Verbruggen H.                              | Philippines: Bohol: Panglao                      | 9.544           | 123.754          | HV711            | DQ472047                   |
| ○   | <i>Canistrocarpus cervicornis</i> | Verbruggen H., Van Nieuwenhuyze K.         | Tanzania: Zanzibar: Matemwe                      | -5.889          | 39.361           | TZ0714C          | GQ466069                   |
| ○   | <i>Canistrocarpus crispatus</i>   | De Clerck O.                               | Kenya: Tiwi                                      | -4.245          | 39.604           | ODC1545          | GU265787                   |
| ○   | <i>Canistrocarpus crispatus</i>   | Verbruggen H.                              | Philippines: Bohol: Panglao                      | 9.544           | 123.759          | HV721            | (See Table S2)             |
| ○   | <i>Canistrocarpus crispatus</i>   | De Clerck O., Leliaert F., Payo D.A.       | Philippines: Negros Oriental: Dumaguete          | 9.331           | 123.309          | ODC1444          | (See Table S2)             |
| ○   | <i>Dictyopteris delicatula</i>    | Tronholm A., Steen F.                      | Cape Verde: Sao Tiago: Pedra Badejo              | 15,142          | -23,527          | FS851            | JQ061090                   |
| ○   | <i>Dictyopteris delicatula</i>    | (See Bittner et al. 2008)                  |                                                  |                 |                  |                  | EU579943                   |
| ○   | <i>Dictyopteris divaricata</i>    | (See Bittner et al. 2008)                  |                                                  |                 |                  |                  | AY422676                   |
| ○   | <i>Dictyopteris divaricata</i>    | GenBank                                    |                                                  |                 |                  |                  | AY430343                   |
| ○   | <i>Dictyopteris latiuscula</i>    | (See Bittner et al. 2008)                  |                                                  |                 |                  |                  | AY422677                   |
| ○   | <i>Dictyopteris latiuscula</i>    | GenBank                                    |                                                  |                 |                  |                  | AY430349                   |
| ○   | <i>Dictyopteris polypodioides</i> | (See Silberfeld et al. 2010)               |                                                  |                 |                  |                  | EU681404                   |
| ○   | <i>Dictyopteris polypodioides</i> | (See Silberfeld et al. 2010)               |                                                  |                 |                  |                  | EU681445                   |
| ○   | <i>Dictyopteris polypodioides</i> | (See Bittner et al. 2008)                  |                                                  |                 |                  |                  | EU579932                   |
| ○   | <i>Dictyopteris polypodioides</i> | (See Silberfeld et al. 2010)               |                                                  |                 |                  |                  | EU681639                   |
| ○   | <i>Dictyopteris polypodioides</i> | De Clerck O.                               | France: Marseille: Ile de Frioul                 | 43.273          | 5.304            | ODC1031          | DQ472097                   |
| ○   | <i>Dictyopteris prolifera</i>     | (See Bittner et al. 2008)                  |                                                  |                 |                  |                  | AY422678                   |
| ○   | <i>Dictyopteris prolifera</i>     | GenBank                                    |                                                  |                 |                  |                  | AY430346                   |
| ○   | <i>Dictyopteris undulata</i>      | (See Bittner et al. 2008)                  |                                                  |                 |                  |                  | AY430333                   |
| ○   | <i>Dictyopteris undulata</i>      | GenBank                                    |                                                  |                 |                  |                  | AY430353                   |
| ○ ● | <i>Dictyota acutiloba</i>         | De Clerck O.                               | United States: Hawaii: Oahu: Honolulu: Ala Moana | 21.286          | -157.849         | ODC888           | (See Table S2)             |
| ○ ● | <i>Dictyota adnata</i>            | Draisma S.G.A.                             | Indonesia: Raja Ampat: Gam                       | -0.519          | 130.570          | SD712204         | JQ061005<br>(See Table S2) |
| ●   | <i>Dictyota adnata</i>            | Draisma S.G.A.                             | Indonesia: Raja Ampat: Gam: Besir Bay            | -0.490          | 130.593          | SD712293         | JQ061006                   |
| ○ ● | <i>Dictyota adnata</i>            | De Clerck O, Leliaert F, Payo D.A.         | Philippines: Negros Oriental: Bais               | 9.576           | 123.159          | ODC1485          | (See Table S2)             |

| Taxon                             | Collector                                  | Locality                                                    | Latitude | Longitude | Id number | Accession no.  |
|-----------------------------------|--------------------------------------------|-------------------------------------------------------------|----------|-----------|-----------|----------------|
| ○ ● <i>Dictyota bartayresiana</i> | De Clerck O.                               | Kenya: Diani Beach                                          | -4.298   | 39.589    | ODC1513   | GQ425183       |
| ○ ● <i>Dictyota bartayresiana</i> | De Clerck O.                               | Kenya: Kinondo Reef                                         | -4.401   | 39.587    | ODC1588   | GQ425107       |
| ○ ● <i>Dictyota bartayresiana</i> | Verbruggen H., Tyberghein L.               | Tanzania: Zanzibar: Chwaka                                  | -6.168   | 39.443    | TZ0802C   | GQ466071       |
| ○ ● <i>Dictyota bartayresiana</i> | Tronholm B.                                | Dominican Republic: Punta Cana: Playa Bávaro                | 18.727   | -68.460   | DR7       | (See Table S2) |
| ● <i>Dictyota bartayresiana</i>   | Tronholm B.                                | Dominican Republic: Catalina Island                         | 18.359   | -69.023   | DR16      | JQ061009       |
| ● <i>Dictyota bartayresiana</i>   | Tronholm B.                                | Dominican Republic: Catalina Island                         | 18.359   | -69.023   | DR17      | JQ061010       |
| ● <i>Dictyota bartayresiana</i>   | Alfonso Y.                                 | Cuba: Pinar del Río Province: Cabañas                       | 22.989   | -82.928   | D627      | JQ061007       |
| ● <i>Dictyota bartayresiana</i>   | De Clerck O.                               | Kenya: Chale Island                                         | -4.450   | 39.533    | ODC1663   | JQ061008       |
| ● <i>Dictyota bartayresiana</i>   | Pauly K.                                   | Tanzania: Mtwara: Ruvula                                    | -10.317  | 40.398    | TZ0277    | JQ061013       |
| ● <i>Dictyota bartayresiana</i>   | Pauly K.                                   | Tanzania: Mtwara: Ruvula                                    | -10.317  | 40.398    | TZ0279    | JQ061014       |
| ○ <i>Dictyota binghamiae</i>      | Lane C.E.                                  | Canada: British Columbia (see Phillips et al. 2008)         |          |           | Lane      | EF990193       |
| ○ ● <i>Dictyota binghamiae</i>    | Verbruggen H., Zechman F.                  | Mexico: Baja California: La Bufadora                        | 31.725   | -116.719  | HV1542    | JQ061015       |
| ● <i>Dictyota binghamiae</i>      | Verbruggen H., Hernández J.                | Baja California: Kennedy Camp                               | 31.701   | -116.683  | HV1801    | JQ061016       |
| ○ ● <i>Dictyota binghamiae</i>    | Verbruggen H., Hernández J.                | Baja California: Kennedy Camp                               | 31.701   | -116.683  | HV1802    | JQ061017       |
| ● <i>Dictyota canaliculata</i>    | Draisma S.G.A.                             | Indonesia: Raja Ampat: Gam: Desa Besar                      | -0.463   | 130.687   | SD712400  | GQ466072       |
| ○ <i>Dictyota canaliculata</i>    | Draisma S.G.A.                             | Indonesia: Raja Ampat: Yeffam Island                        | -0.569   | 130.274   | SD712709  | (See Table S2) |
| ○ ● <i>Dictyota canaliculata</i>  | De Clerck O, Leliaert F, Payo D.A.         | Philippines: Siquijor: Dapdap                               | 9.224    | 123.516   | ODC1477   | (See Table S2) |
| ○ ● <i>Dictyota cf. caribaea</i>  | Verbruggen H.                              | Jamaica: St. Ann Parish: St. Ann's Bay: Drax Hall           | 18.443   | -77.182   | HV926     | (See Table S2) |
| ● <i>Dictyota cf. caribaea</i>    | Moreira L.                                 | Cuba: Cienfuegos Province: Bahía de Cienfuegos: Punta Gorda | 22.133   | -80.464   | D630      | JQ061058       |
| ● <i>Dictyota cf. caribaea</i>    | Cabrera R.                                 | Cuba: Camaguey Province: Santa Cruz del Sur                 | 20.697   | -77.998   | RC175     | JQ061059       |
| ○ ● <i>Dictyota ceylanica</i>     | Verbruggen H.                              | French Polynesia: Tahiti: Faaa                              | -17.549  | -149.618  | HV214a    | (See Table S2) |
| ○ ● <i>Dictyota ceylanica</i>     | De Clerck O, Leliaert F, Payo D.A.         | Philippines: Negros Oriental: Dumaguete                     | 9.330    | 123.309   | ODC1442   | (See Table S2) |
| ○ ● <i>Dictyota ciliolata</i>     | Tronholm A., Sansón M., Afonso-Carrillo J. | Spain: Canary Islands: Tenerife: Punta Hidalgo              | 28.578   | -16.328   | D191      | (See Table S2) |
| ○ ● <i>Dictyota ciliolata</i>     | Tronholm A.                                | Spain: Canary Islands: Gran Canaria: Faro de Maspalomas     | 27.734   | -15.599   | D395      | GQ425192       |
| ○ ● <i>Dictyota ciliolata</i>     | Verbruggen H.                              | Philippines: Olango Island                                  | 10.215   | 123.997   | HV632     | GQ425124       |
| ● <i>Dictyota ciliolata</i>       | Verbruggen H.                              | Philippines: Bohol: Panglao                                 | 9.5435   | 123.759   | HV723     | GQ466073       |
| ● <i>Dictyota ciliolata</i>       | Breeman A.                                 | Tenerife: Punta del Hidalgo                                 | 28.580   | -16.325   | LB2819    | JQ061021       |
| ● <i>Dictyota ciliolata</i>       | De Clerck O, Leliaert F, Payo D.A.         | Philippines: Negros Oriental: Dumaguete                     | 9.331    | 123.309   | ODC1441   | JQ061022       |
| ● <i>Dictyota ciliolata</i>       | De Clerck O, Leliaert F, Payo D.A.         | Philippines: Siquijor: Sawang                               | 9.197    | 123.447   | ODC1457   | JQ061023       |

| Taxon                                                      | Collector                          | Locality                                                       | Latitude | Longitude | Id number | Accession no.              |
|------------------------------------------------------------|------------------------------------|----------------------------------------------------------------|----------|-----------|-----------|----------------------------|
| ● <i>Dictyota ciliolata</i>                                | De Clerck O.                       | Kenya: Kinondo Reef                                            | -4.401   | 39.587    | ODC1563   | JQ061024                   |
| ● <i>Dictyota ciliolata</i>                                | Draisma S.G.A.                     | Indonesia: Raja Ampat: Gam                                     | -0.536   | 130.579   | SD712150  | JQ061025                   |
| ● <i>Dictyota ciliolata</i>                                | Draisma S.G.A.                     | Indonesia: Raja Ampat: Gam                                     | -0.536   | 130.579   | SD712571  | JQ061026                   |
| ● <i>Dictyota ciliolata</i>                                | Verbruggen H., Pauly K.            | Tanzania: Mbudya Island                                        | -6.653   | 39.248    | TZ0046    | JQ061027                   |
| ● <i>Dictyota ciliolata</i>                                | Pauly K.                           | Tanzania: Mtwara: Ruvula                                       | -10.317  | 40.398    | TZ0276    | JQ061028                   |
| ● <i>Dictyota ciliolata</i>                                | Verbruggen H., Van Nieuwenhuyze K. | Tanzania: Zanzibar: Matemwe                                    | -5.888   | 39.361    | TZ0733    | JQ061029                   |
| ● <i>Dictyota ciliolata</i><br>(as <i>D. menstrualis</i> ) | Searles R.                         | United States: North Carolina: Beaufort: Radio Island          | 34.715   | -76.691   | Searles-2 | JQ061064                   |
| ○ ● <i>Dictyota ciliolata</i><br>(as <i>D. plectens</i> )  | Cowling T.                         | Australia: Queensland: Yeppoon: Keppel Bay                     | -23.136  | 150.760   | TC2       | JQ061075                   |
| ○ ● <i>Dictyota ciliolata</i><br>(as <i>D. plectens</i> )  | Saunders G.W.                      | Australia: Lord Howe Island: Ned's Beach                       | 159.066  | -31.5167  | GWS1029   | JQ061074                   |
| ● <i>Dictyota coriacea</i>                                 | Verbruggen H., Hernandez J.        | Mexico: Baja California: Bahia Todos Santos: La Joya           | 31.719   | -116.668  | HV1810    | JQ061030                   |
| ○ ● <i>Dictyota coriacea</i>                               | Murray S.                          | United States: California: Dana Point                          | 33.459   | -117.718  | CSUF003   | (See Table S2)             |
| ● <i>Dictyota coriacea</i>                                 | Lee W.J.                           | South Korea: Yeonam Gangwondo                                  | 36.037   | 129.436   | WJ1       | AY422613                   |
| ○ ● <i>Dictyota coriacea</i>                               | Lee W.J.                           | South Korea: Yeonam Gangwondo                                  | 36.037   | 129.436   | WJ3       | AY422612                   |
| ○ ● <i>Dictyota crenulata</i> #1                           | Verbruggen H.                      | Mexico: Baja California Sur: Cabo San Lucas: Playa Santa Maria | 22.930   | -109.815  | HV1074    | (See Table S2)             |
| ● <i>Dictyota crenulata</i> #1                             | Verbruggen H., Tyberghein L.       | Mexico: Oaxaca: Mazunte: Mazunte Beach                         | 15.660   | -96.555   | MX0082    | JQ061032                   |
| ● <i>Dictyota crenulata</i> #1                             | Fernández C.                       | Mexico: Oaxaca: Bahia de Huatulco: Tocolunda                   | 15.665   | -96.496   | CFMX206   | JQ061089                   |
| ○ ● <i>Dictyota crenulata</i> #2                           | Tronholm A.                        | Spain: Canary Islands: Tenerife: Playa de Las Arenas           | 28.371   | -16.877   | D319      | (See Table S2)             |
| ○ ● <i>Dictyota crenulata</i> #2                           | Tronholm A.                        | Spain: Canary Islands: Tenerife: Playa de Las Arenas           | 28.371   | -16.877   | D504      | (See Table S2)             |
| ● <i>Dictyota crenulata</i> #2                             | Tronholm A., Steen F.              | Cape Verde: Sal: Pedra Lume                                    | 16.762   | -22.889   | FS927     | JQ061084                   |
| ● <i>Dictyota crenulata</i> #2                             | Tronholm A., Steen F.              | Cape Verde: Santo Antao: Ponta do Sol                          | 17.2032  | -25.094   | FS987     | JQ061085                   |
| ● <i>Dictyota crenulata</i> #2                             | Tronholm A., Steen F.              | Cape Verde: Sal: Baia da Murdeira                              | 16.678   | -22.937   | FS879     | JQ061086                   |
| ● <i>Dictyota crenulata</i> #2                             | Tronholm A., Steen F.              | Cape Verde: Sal: Baia da Murdeira                              | 16.678   | -22.937   | FS871     | JQ061087                   |
| ● <i>Dictyota crenulata</i> #2                             | Tronholm A., Steen F.              | Cape Verde: Sal: Pedra Lume                                    | 16.762   | -22.889   | FS928     | JQ061088                   |
| ○ ● <i>Dictyota crenulata</i> #3                           | Tronholm B.                        | Dominican Republic: Punta Cana: Playa Bávaro                   | 18.727   | -68.460   | DR27      | JQ061055<br>(See Table S2) |
| ● <i>Dictyota crenulata</i> #3                             | Tronholm B.                        | Dominican Republic: Punta Cana: Playa Bávaro                   | 18.727   | -68.460   | DR28      | JQ061056                   |
| ● <i>Dictyota crenulata</i> #3                             | Alfonso Y.                         | Cuba: Habana: Miramar                                          | 23.134   | -82.413   | D631      | JQ061054                   |
| ● <i>Dictyota crenulata</i> #3                             | Cabrera R.                         | Cuba: Miramar: Calle 42                                        | 23.120   | -82.434   | RC154     | JQ061057                   |

| Taxon                            | Collector                  | Locality                                                         | Latitude | Longitude | Id number | Accession no.              |
|----------------------------------|----------------------------|------------------------------------------------------------------|----------|-----------|-----------|----------------------------|
| ● <i>Dictyota crenulata</i> #3   | Tronholm A., Steen F.      | Cape Verde Islands: Sal: Baia da Murdeira                        | 16.678   | -22.935   | FS881     | JQ061083                   |
| ○ ● <i>Dictyota crenulata</i> #4 | Tronholm A.                | Spain: Canary Islands: Tenerife: Punta Hidalgo                   | 28.580   | -16.325   | D193      | JQ061093                   |
| ○ ● <i>Dictyota crenulata</i> #4 | Tronholm A.                | Spain: Canary Islands: Tenerife: Buenavista: Playa de Las Arenas | 28.371   | -16.871   | D324      | JQ061050<br>(See Table S2) |
| ○ ● <i>Dictyota crenulata</i> #4 | Tronholm A.                | Spain: Canary Islands: Gran Canaria: Faro de Maspalomas          | 27.734   | -15.599   | D394      | JQ061051                   |
| ○ <i>Dictyota crenulata</i> #4   | Tronholm A.                | Spain: Canary Islands: Tenerife: El Médano                       | 28.044   | -16.536   | D404      | (See Table S2)             |
| ● <i>Dictyota crenulata</i> #4   | Tronholm A.                | Spain: Canary Islands: Tenerife: Punta Hidalgo                   | 28.580   | -16.325   | D310      | JQ061049                   |
| ● <i>Dictyota crenulata</i> #4   | Tronholm A.                | Spain: Canary Islands: Tenerife: Punta Hidalgo                   | 28.580   | -16.325   | D400      | JQ061052                   |
| ● <i>Dictyota crenulata</i> #4   | Tronholm A.                | Spain: Canary Islands: Tenerife: Punta Hidalgo                   | 28.580   | -16.325   | D401      | JQ061053                   |
| ○ ● <i>Dictyota cyanoloma</i>    | Tronholm A.                | Spain: Canary Islands: Gran Canaria: Arinaga: Zoco del Negro     | 27.866   | -15.384   | D502      | (See Table S2)             |
| ○ ● <i>Dictyota cyanoloma</i>    | Tronholm A.                | Portugal: Algarve: Portimão: Praia da Rocha                      | 37.117   | -8.547    | D544      | (See Table S2)             |
| ● <i>Dictyota cyanoloma</i>      | Lluch R.                   | Spain: Barcelona                                                 | 41.331   | 2.173     | D621      | GU255592                   |
| ● <i>Dictyota cyanoloma</i>      | Lluch R.                   | Spain: Barcelona                                                 | 41.331   | 2.173     | D623      | GU255593                   |
| ● <i>Dictyota cyanoloma</i>      | Pauly K.                   | Portugal: Algarve: Carvoeiro: A Boneca                           | 37.093   | -8.465    | FAO006    | GU255594                   |
| ● <i>Dictyota cyanoloma</i>      | Steen F.                   | Portugal: Algarve: Lagos: Praia da Dona Ana                      | 37.091   | -8.669    | FS539     | JQ061033                   |
| ● <i>Dictyota cyanoloma</i>      | Steen F.                   | Portugal: Algarve: Porto Covo                                    | 37.827   | -8.792    | FS428     | JQ061034                   |
| ● <i>Dictyota cyanoloma</i>      | Steen F.                   | Portugal: Algarve: Porto Covo                                    | 37.827   | -8.792    | FS429     | JQ061035                   |
| ● <i>Dictyota cyanoloma</i>      | Steen F.                   | Portugal: Algarve:Albufeira: Olhos de Agua                       | 37.089   | -8.194    | FS469     | JQ061036                   |
| ● <i>Dictyota cyanoloma</i>      | Coppejans E., De Clerck O. | Portugal: Madeira Island: Rais Magos                             | 32.602   | -16.804   | HEC15777  | GU255595                   |
| ● <i>Dictyota cyanoloma</i>      | Amaral, Alvaro, Couto      | Portugal: Azores: Pico: Santa Barbara                            | 38.391   | -28.213   | Pix07637  | GU255544                   |
| ○ ● <i>Dictyota cymatophila</i>  | Tronholm A.                | Spain: Canary Islands: Tenerife: Punta del Hidalgo               | 28.580   | -16.325   | D306      | GQ425193                   |
| ○ ● <i>Dictyota cymatophila</i>  | Tronholm A.                | Spain: Canary Islands: Gran Canaria: El Berriel                  | 27.785   | -15.501   | D397      | GQ425197<br>(See Table S2) |
| ○ ● <i>Dictyota cymatophila</i>  | Tronholm A.                | Spain: Canary Islands: Tenerife: Punta del Hidalgo               | 28.580   | -16.325   | D403      | GQ425199<br>(See Table S2) |
| ○ ● <i>Dictyota cymatophila</i>  | Tronholm A.                | Spain: Canary Islands: Tenerife: El Médano                       | 28.044   | -16.536   | D406      | GQ425201<br>(See Table S2) |
| ● <i>Dictyota cymatophila</i>    | Tronholm A.                | Spain: Canary Islands: Tenerife: Punta del Hidalgo               | 28.580   | -16.325   | D399      | GQ425198                   |
| ● <i>Dictyota cymatophila</i>    | Tronholm A.                | Spain: Canary Islands: Gran Canaria: Faro de Maspalomas          | 27.734   | -15.599   | D393      | GQ425196                   |
| ● <i>Dictyota cymatophila</i>    | Tronholm A.                | Spain: Canary Islands: Gran Canaria: Faro de Maspalomas          | 27.734   | -15.599   | D392      | GQ425195                   |
| ● <i>Dictyota cymatophila</i>    | Tronholm A.                | Spain: Canary Islands: Tenerife: El Médano                       | 28.044   | -16.536   | D405      | GQ425200                   |

| Taxon                           | Collector                                  | Locality                                                         | Latitude | Longitude | Id number | Accession no.              |
|---------------------------------|--------------------------------------------|------------------------------------------------------------------|----------|-----------|-----------|----------------------------|
| ○ ● <i>Dictyota dhofarensis</i> | Schils T., Pauly K., Provoost P.           | Oman: Dhofar: Mirbat                                             | 17.050   | 55.086    | DHO0163   | (See Table S2)             |
| ○ ● <i>Dictyota dichotoma</i>   | Tronholm A., Sansón M., Afonso-Carrillo J. | Spain: Canary Islands: Tenerife: Punta Hidalgo                   | 28.578   | -16.328   | D190      | GQ425202<br>(See Table S2) |
| ● <i>Dictyota dichotoma</i>     | Tronholm A.                                | Spain: Canary Islands: Tenerife: Abades                          | 28.136   | -16.442   | ATV78     | GU255618                   |
| ● <i>Dictyota dichotoma</i>     | Tronholm A.                                | Spain: Canary Islands: Tenerife: Punta de Teno                   | 28.342   | -16.924   | ATV101    | GU255637                   |
| ○ <i>Dictyota dichotoma</i>     | De Clerck O.                               | France: Nord-Pas-de-Calais: Audreselles: Pointe du Nid de Corbet | 50.829   | 1.590     | ODC1027   | DQ472051                   |
| ○ <i>Dictyota dichotoma</i>     | De Clerck O.                               | France: Languedoc-Roussillon: Banyuls: Cap du Troc               | 42.481   | 3.143     | ODC1055   | GQ425131                   |
| ● <i>Dictyota dichotoma</i>     | De Clerck O., Rodriguez-Prieto C.          | Spain: Cataluña: Girona: Begur                                   | 41.961   | 3.230     | ODC1688   | GU255541                   |
| ○ <i>Dictyota dichotoma</i>     | De Clerck O., Zuccarello G.C.              | United Kingdom: England: Barrow-in-furness: Walney Island        | 54.080   | -3.245    | ODC1689   | GU255542                   |
| ● <i>Dictyota dichotoma</i>     | De Clerck O. & Rodriguez-Prieto C.         | Spain : Cataluña: Begur: Sa Tuna                                 | 41.961   | 3.230     | ODC1695   | GU255543                   |
| ● <i>Dictyota dichotoma</i>     | Pauly K.                                   | Portugal: Algarve: Carvoeiro: A Boneca                           | 37.093   | -8.465    | FAO005    | GU255530                   |
| ● <i>Dictyota dichotoma</i>     | Kooistra W.                                | Italy: Naples: Posilipo                                          | 40.794   | 14.1934   | Kooistra2 | GU255536                   |
| ● <i>Dictyota dichotoma</i>     | Steen F., De Clerck O.                     | France: Brittany: Roscoff: Ile Verte                             | 48.728   | -3.984    | FS094     | GU255774                   |
| ● <i>Dictyota dichotoma</i>     | Steen F.                                   | France: Brittany: Pointe de Raz: Anse de Loc'h                   | 48.029   | -4.635    | FS114     | GU255809                   |
| ● <i>Dictyota dichotoma</i>     | Steen F., Hollants J.                      | France: Brittany: Pointe de Moustierlin                          | 47.845   | -4.012    | FS160     | FJ869842                   |
| ● <i>Dictyota dichotoma</i>     | Steen F., Hollants J., Verlaque M.         | France: Provence: Carry-le-Rouet: Sausset les Pins               | 43.329   | 5.105     | FS255     | GU255778                   |
| ● <i>Dictyota dichotoma</i>     | Steen F., Hollants J., Verlaque M.         | France: Provence: Cassis: Cap Canaille                           | 43.207   | 5.547     | FS327     | GU255795                   |
| ● <i>Dictyota dichotoma</i>     | Poloniato D.                               | Italy: Trieste                                                   | 45.605   | 13.713    | DP001     | GU255769                   |
| ● <i>Dictyota dichotoma</i>     | Coppejans E.                               | France: Bretagne: Roscoff: Ile Verte                             | 48.732   | -3.989    | HEC15604  | GU255531                   |
| ● <i>Dictyota dichotoma</i>     | Azevedo, Torrão                            | Portugal: Azores: Pico: Manhena                                  | 38.411   | -28.033   | Pix071332 | GU255765                   |
| ● <i>Dictyota dichotoma</i>     |                                            | Ireland: Galway                                                  |          |           |           | AY528442                   |
| ● <i>Dictyota fasciola</i>      | De Clerck O.                               | France: Languedoc-Roussillon: Port Vendres: Les Paulilles        | 42.522   | 3.114     | ODC1045   | GU255551                   |
| ○ ● <i>Dictyota fasciola</i>    | De Clerck O.                               | France: Languedoc-Roussillon: Banyuls: Cap du Troc               | 42.481   | 3.143     | ODC1057   | FJ869846<br>(See Table S2) |
| ○ ● <i>Dictyota fasciola</i>    | De Clerck O.                               | France: Languedoc-Roussillon: Côte Vermeille: Cap Peyferite      | 42.454   | 3.166     | ODC1065   | GQ466074<br>(See Table S2) |
| ○ <i>Dictyota fasciola</i>      | De Clerck O.                               | France: Languedoc-Roussillon: Côte Vermeille: Cap Peyferite      | 42.454   | 3.166     | ODC1066   | FJ869847                   |
| ● <i>Dictyota fasciola</i>      | Tronholm A.                                | Spain: Canary Islands: Tenerife: Playa de Las Arenas             | 28.371   | -16.872   | ATV94     | GU255633                   |
| ● <i>Dictyota fasciola</i>      | Tronholm A.                                | Spain: Canary Islands: Lanzarote: Famara                         | 29.119   | -13.564   | D271      | GQ425209                   |
| ● <i>Dictyota fasciola</i>      | Tronholm A.                                | Spain: Canary Islands: Tenerife: Punta del Hidalgo               | 28.580   | -16.325   | D307      | GU255546                   |

| Taxon                             | Collector                                  | Locality                                                       | Latitude | Longitude | Id number | Accession no.              |
|-----------------------------------|--------------------------------------------|----------------------------------------------------------------|----------|-----------|-----------|----------------------------|
| ● <i>Dictyota fasciola</i>        | Tronholm A., Sansón M., Afonso-Carrillo J. | Spain: Canary Islands: Tenerife: El Médano                     | 28.044   | -16.536   | D344      | GQ425211                   |
| ● <i>Dictyota fasciola</i>        | Tronholm A.                                | Spain: Canary Islands: Gran Canaria: Medio Almud               | 27.800   | -15.739   | D354      | GQ425212                   |
| ● <i>Dictyota fasciola</i>        | Furnari G.                                 | Italy: Siracusa: Porto Palo                                    | 36.689   | 15.138    | D643      | GU255548                   |
| ○ ● <i>Dictyota friabilis</i>     | Verbruggen H., Zubia M.                    | French Polynesia: Tahiti: Arue                                 | -17.520  | -149.547  | HV153     | (See Table 2)              |
| ○ ● <i>Dictyota friabilis</i>     | Littler D., Littler M.                     | Netherlands Antilles: Saba: Saba Bank                          | 17.508   | -63.440   | DML67250  | JQ061038<br>(See Table 2)  |
| ○ ● <i>Dictyota friabilis</i>     | De Clerck O.                               | United States: Hawaii: Oahu: Lanikai                           | 21.396   | -157.720  | ODC898    | JQ061041<br>(See Table 2)  |
| ● <i>Dictyota friabilis</i>       | De Clerck O, Leliaert F, Payo D.A.         | Philippines: Negros Oriental: Apo Island                       | 9.083    | 123.25    | ODC1492   | JQ061040                   |
| ● <i>Dictyota friabilis</i>       | Draisma S.G.A.                             | Indonesia: Raja Ampat: Sleeping Barracuda reef                 | -0.545   | 130.7     | SD712192  | JQ061042                   |
| ○ ● <i>Dictyota grossedentata</i> | Pauly K.                                   | Tanzania: Zanzibar: Mnemba atoll                               | -5.838   | 39.392    | TZ0490    | (See Table 2)              |
| ○ ● <i>Dictyota hamifera</i>      | Verbruggen H., N'Yeurt A.                  | French Polynesia: Tahiti: Afaahiti                             | -17.738  | -149.262  | HV222     | (See Table 2)              |
| ○ <i>Dictyota hamifera</i>        | Littler D., Littler M.                     | Netherlands Antilles: Saba: Saba Bank                          | 17.508   | -63.441   | DML67438  | GQ425112                   |
| ○ ● <i>Dictyota humifusa</i>      | De Clerck O.                               | Kenya: Chale Island                                            | -4.450   | 39.533    | ODC1659   | JQ061044<br>(See Table 2)  |
| ○ ● <i>Dictyota humifusa</i>      | Draisma S.G.A.                             | Indonesia: Raja Ampat: Kri                                     | -0.556   | 130.691   | SD712066  | JQ061045<br>(See Table 2)  |
| ○ ● <i>Dictyota humifusa</i>      | Draisma S.G.A.                             | Indonesia: Raja Ampat: Gam                                     | -0.429   | 130.56    | SD712460  | (See Table 2)              |
| ○ ● <i>Dictyota implexa</i>       | De Clerck O., Heytens M.                   | Spain: Cataluña: Girona: Palamós: Cala Corbs                   | 41.858   | 3.147     | ODC1238   | (See Table 2)              |
| ○ <i>Dictyota implexa</i>         | Steen F., Hollants J., Verlaque M.         | Provence: Carry-le-Rouet: Sausset les Pins                     | 43.329   | 5.105     | FS271     | GQ425135                   |
| ○ <i>Dictyota implexa</i>         | Le Gall L.                                 | Croatia: Mljet Island: Prozura                                 | 42.730   | 17.653    | LLGO249   | GQ425140                   |
| ○ <i>Dictyota implexa</i>         | Le Gall L.                                 | Croatia: Korcula Island: Badija                                | 42.951   | 17.163    | LLGO300   | GQ425168                   |
| ○ ● <i>Dictyota implexa</i>       | Kooistra W.                                | Italy: Naples: Posilipo                                        | 40.794   | 14.193    | Kooistra1 | GU255588<br>(See Table S2) |
| ● <i>Dictyota implexa</i>         | Pena C.                                    | Spain: Balears: Menorca: Cap Morell                            | 40.055   | 3.879     | ABH599    | GU255574                   |
| ● <i>Dictyota implexa</i>         | Tronholm A.                                | Spain: Canary Islands: Tenerife: Playa de Las Arenas           | 28.371   | -16.872   | ATV93     | GU255632                   |
| ● <i>Dictyota implexa</i>         | Lane C.E, Schneider C.W.                   | Bermuda: Saint George                                          | 32.357   | -64.683   | CLO30101  | GQ425216                   |
| ● <i>Dictyota implexa</i>         | Tronholm A.                                | Spain: Canary Islands: Lanzarote: Puerto del Carmen            | 28.919   | -13.666   | D282      | GU255575                   |
| ● <i>Dictyota implexa</i>         | Tronholm A.                                | Spain: Canary Islands: La Graciosa: Caleta del Sebo            | 29.225   | -13.505   | D288      | GU255577                   |
| ● <i>Dictyota implexa</i>         | Tronholm A.                                | Spain: Canary Islands: Tenerife: La Guancha: Charco del Viento | 28.401   | -16.673   | D303      | GU255579                   |
| ● <i>Dictyota implexa</i>         | Tronholm A.                                | Spain: Canary Islands: Tenerife: Playa de Las Arenas           | 28.371   | -16.872   | D327      | GU255580                   |

| Taxon                            | Collector                         | Locality                                                             | Latitude | Longitude | Id number | Accession no.              |
|----------------------------------|-----------------------------------|----------------------------------------------------------------------|----------|-----------|-----------|----------------------------|
| ● <i>Dictyota implexa</i>        | Tronholm A.                       | Spain: Canary Islands: Gran Canaria: Medio Almud                     | 27.800   | -15.739   | D349      | GU255581                   |
| ● <i>Dictyota implexa</i>        | Tronholm A.                       | Spain: Canary Islands: Gran Canaria: Arinaga: Zoco del Negro         | 27.866   | -15.385   | D506      | GU255584                   |
| ● <i>Dictyota implexa</i>        | Poloniato D.                      | Italy: Trieste                                                       | 45.605   | 13.713    | DP002     | GU255770                   |
| ● <i>Dictyota implexa</i>        | De Clerck O.                      | France: Languedoc-Roussillon: Côte Vermeille: Cerbère: Cap Peyferite | 42.454   | 3.166     | ODC1073   | GU255589                   |
| ● <i>Dictyota implexa</i>        | Azevedo, Couto, Torrão            | Portugal: Azores: Pico: Feteira                                      | 38.402   | -28.068   | PIX071434 | GU255766                   |
| ● <i>Dictyota implexa</i>        | Bárbara I.                        | Algarve: Armacao de Pera                                             | 37.100   | -8.358    | Sant19426 | GU255583                   |
| ○ ● <i>Dictyota intermedia</i>   | Cowling T.                        | Australia: Queensland: Yeppoon: Keppel Bay                           | -23.136  | 150.760   | TC1       | (See Table S2)             |
| ● <i>Dictyota intermedia</i>     | Saunders G.W.                     | Australia: Lord Howe Island                                          | -31.552  | 159.081   | GWS1020   | JQ061047                   |
| ○ ● <i>Dictyota kunthii</i>      | Faugeron S.                       | Chile: Pan de Azúcar                                                 | -26.151  | -70.670   | D102      | (See Table S2)             |
| ○ <i>Dictyota kunthii</i>        | Faugeron S.                       | Chile: Maitencillo                                                   | -31.470  | -71.588   | D104      | GU290231                   |
| ○ ● <i>Dictyota liturata</i>     | Coppejans E., De Clerck O.        | Portugal: Madeira Island: Rais Magos                                 | 32.602   | -16.804   | HEC15721  | JQ061063<br>(See Table S2) |
| ○ ● <i>Dictyota liturata</i>     | Coppejans E., De Clerck O.        | Portugal: Madeira Island: Porto da Cruz                              | 32.773   | -16.827   | HEC15816  | GQ466075                   |
| ○ ● <i>Dictyota liturata</i>     | De Clerck O., Leliaert F.         | South Africa: Durban: The Bluff                                      | -34.120  | 18.460    | KZN2282   | GQ425214<br>(See Table S2) |
| ○ <i>Dictyota liturata</i>       | Solé M.                           | Venezuela: Isla De Margarita: Porlamar: Playa El Agua                | 10.953   | -63.844   | Sole1     | GQ425113                   |
| ● <i>Dictyota liturata</i>       | Tronholm A.                       | Portugal: Madeira Island: Rais Magos                                 | 32.602   | -16.804   | D693      | JQ061060                   |
| ● <i>Dictyota liturata</i>       | Tronholm A.                       | Portugal: Madeira Island: Rais Magos                                 | 32.602   | -16.804   | D694      | JQ061061                   |
| ● <i>Dictyota liturata</i>       | Coppejans E., De Clerck O.        | Portugal: Madeira: Funchal: Cais de Carvão                           | 32.634   | -16.940   | HEC15674  | JQ061062                   |
| ○ <i>Dictyota mediterranea</i>   | Le Gall L.                        | Croatia: Hvar Island                                                 | 43.155   | 16.387    | LLGO224   | GU290246                   |
| ○ ● <i>Dictyota mediterranea</i> | Le Gall L.                        | Croatia: Korcula Island: Kneza                                       | 42.971   | 17.048    | LLGO313   | GU255570<br>(See Table S2) |
| ○ ● <i>Dictyota mediterranea</i> | Furnari G.                        | Italy: Siracusa: Porto Palo                                          | 36.689   | 15.138    | D653      | GU255569                   |
| ○ <i>Dictyota mediterranea</i>   | Draisma S.G.A.                    | Italy: Sicily: Giardini Naxos                                        | 37.822   | 15.278    | SGAD1116  | (See Table S2)             |
| ○ <i>Dictyota mediterranea</i>   | Pena C., Martínez M., Crespo M.B. | Spain: Baleares: Mallorca                                            | 39.788   | 3.178     | D595      | GU290254                   |
| ● <i>Dictyota mediterranea</i>   | Furnari G.                        | Italy: Agrigento: Siculiana                                          | 37.314   | 13.414    | D633      | GU255566                   |
| ● <i>Dictyota mediterranea</i>   | Furnari G.                        | Italy: Siracusa: Porto Palo                                          | 36.689   | 15.138    | D651      | GU255568                   |
| ○ <i>Dictyota mertensii</i>      | Verbruggen H.                     | Jamaica: St. Ann Parish: Priory                                      | 18.456   | -77.226   | HV911     | GQ425158                   |
| ○ ● <i>Dictyota mertensii</i>    | Tronholm B.                       | Dominican Republic: Punta Cana: Playa Bávaro                         | 18.727   | -68.460   | DR31      | (See Table S2)             |

| Taxon                            | Collector                                               | Locality                                                             | Latitude | Longitude | Id number | Accession no.              |
|----------------------------------|---------------------------------------------------------|----------------------------------------------------------------------|----------|-----------|-----------|----------------------------|
| ○ ● <i>Dictyota mertensii</i>    | Tronholm B.                                             | Dominican Republic: Punta Cana: Playa Bávaro                         | 18.727   | -68.460   | DR32      | JQ061065<br>(See Table S2) |
| ○ ● <i>Dictyota naevosa</i>      | De Clerck O., Schils T., Verbruggen H., Demeulenaere E. | South Africa: Kwazulu-Natal: Palm Beach                              | -31.003  | 30.2670   | KZNB2345  | JQ061067<br>(See Table S2) |
| ○ ● <i>Dictyota naevosa</i>      | De Clerck O., Leliaert F.                               | South Africa: Kwazulu-Natal: Mission Rocks                           | -28.277  | 32.506    | KZN2241   | (See Table S2)             |
| ● <i>Dictyota naevosa</i>        | Anderson R.J.                                           | South Africa: Western Cape Province: De Hoop Nature Reserve          | -34.498  | 20.477    | D659      | JQ061066                   |
| ○ ● <i>Dictyota nigricans</i>    | Huisman J.                                              | Australia: Western Australia: Perth: Penguin Island                  | -32.311  | 115.691   | D92       | (See Table S2)             |
| ○ <i>Dictyota pinnatifida</i>    | Lane C., Schneider C.W.                                 | Bermuda: Horseshoe Bay                                               | 32.252   | -64.821   | CLO31302  | GQ425157                   |
| ○ ● <i>Dictyota pinnatifida</i>  | Verbruggen H.                                           | Jamaica: St. Ann Parish: Priory                                      | 18.449   | -77.217   | HV902     | (See Table S2)             |
| ○ <i>Dictyota pinnatifida</i>    | Verbruggen H.                                           | Jamaica: St. Ann Parish: Priory: Chris Cove                          | 18.456   | -77.233   | HV932     | (See Table S2)             |
| ○ ● <i>Dictyota pinnatifida</i>  | Solé M.                                                 | Venezuela: Isla De Margarita: Playa El Tirano                        | 11.119   | -63.842   | Sole3     | JQ061073<br>(See Table S2) |
| ● <i>Dictyota pinnatifida</i>    | Tronholm B.                                             | Dominican Republic: Punta Cana: Playa Bávaro                         | 18.727   | -68.460   | DR1       | JQ061069                   |
| ● <i>Dictyota pinnatifida</i>    | Tronholm B.                                             | Dominican Republic: Punta Cana: Playa Bávaro                         | 18.727   | -68.460   | DR4       | JQ061070                   |
| ● <i>Dictyota pinnatifida</i>    | Tronholm B.                                             | Dominican Republic: Punta Cana: Playa Bávaro                         | 18.727   | -68.460   | DR5       | JQ061071                   |
| ● <i>Dictyota pinnatifida</i>    | Tronholm B.                                             | Dominican Republic: Punta Cana: Playa Bávaro                         | 18.727   | -68.460   | DR6       | JQ061072                   |
| ○ ● <i>Dictyota rigida</i>       | De Clerck O.                                            | Kenya: Mombasa: McKenzie Point                                       | -4.067   | 39.689    | ODC1623   | JQ061077<br>(See Table S2) |
| ○ ● <i>Dictyota rigida</i>       | De Clerck O.                                            | Kenya: Mombasa: McKenzie Point                                       | -4.067   | 39.689    | ODC1657   | (See Table S2)             |
| ● <i>Dictyota rigida</i>         | De Clerck O.                                            | Kenya: Tiwi                                                          | -4.245   | 39.604    | ODC1553   | JQ061076                   |
| ● <i>Dictyota rigida</i>         | Verbruggen H., Van Nieuwenhuyze K.                      | Tanzania: Zanzibar: Matemwe                                          | -5.888   | 39.361    | TZ0731C   | GQ425217                   |
| ○ ● <i>Dictyota sandvicensis</i> | De Clerck O.                                            | United States: Hawaii: Oahu: Honolulu: Ala Moana                     | 21.286   | -157.849  | ODC889    | (See Table S2)             |
| ○ ● <i>Dictyota sandvicensis</i> | De Clerck O.                                            | United States: Hawaii: Oahu: Lanikai                                 | 21.396   | -157.720  | ODC896    | (See Table S2)             |
| ○ ● <i>Dictyota spiralis</i>     | De Clerck O.                                            | France: Provence-Alpes-Côte d'Azur: Île de Frioul                    | 43.277   | 5.303     | ODC1029   | GQ425221<br>(See Table S2) |
| ○ ● <i>Dictyota spiralis</i>     | De Clerck O.                                            | France: Languedoc-Roussillon: Côte Vermeille: Cerbère: Cap Peyferite | 42.454   | 3.166     | ODC1071   | GU255606<br>(See Table S2) |
| ○ ● <i>Dictyota spiralis</i>     | Coppejans E., De Clerck O.                              | Portugal: Madeira Island: Porto da Cruz                              | 32.773   | -16.827   | HEC15815  | GQ466078                   |
| ○ <i>Dictyota spiralis</i>       | De Clerck O., Heytens M.                                | Spain: Cataluña: Girona: Palamós: Cala Corbs                         | 41.858   | 3.147     | ODC1225   | GQ425161                   |
| ● <i>Dictyota spiralis</i>       | Pena C.                                                 | Spain: Baleares: Menorca: Son Bou                                    | 39.899   | 4.072     | ABH596    | GU255596                   |
| ● <i>Dictyota spiralis</i>       | Tronholm A.                                             | Spain: Canary Islands: Tenerife: Punta de Teno                       | 28.342   | -16.924   | ATV103    | GU255638                   |



| Taxon                           | Collector                                  | Locality                                                | Latitude | Longitude | Id number | Accession no.  |
|---------------------------------|--------------------------------------------|---------------------------------------------------------|----------|-----------|-----------|----------------|
| ● <i>Dictyota spiralis</i>      | Tronholm A., Sansón M., Afonso-Carrillo J. | Spain: Canary Islands: Tenerife: El Médano              | 28.0436  | -16.536   | D343      | GQ425219       |
| ● <i>Dictyota spiralis</i>      | Tronholm A.                                | Spain: Canary Islands: Tenerife: Punta Hidalgo          | 28.580   | -16.325   | D308      | GU255597       |
| ● <i>Dictyota spiralis</i>      | Tronholm A.                                | Portugal: Algarve: Albufeira: Galé                      | 37.078   | -8.312    | D543      | GU255598       |
| ● <i>Dictyota spiralis</i>      | Steen F., De Clerck O.                     | France: Normandy: St. Enogat                            | 48.641   | -2.071    | FS068     | GU255839       |
| ● <i>Dictyota spiralis</i>      | Steen F., Hollants J., Verlaque M.         | France: Provence: Carry-le-Rouet: Sausset les Pins      | 43.329   | 5.105     | FS231     | GU255836       |
| ● <i>Dictyota spiralis</i>      | Steen F., Hollants J., Verlaque M.         | France: Provence: Cassis: Cap Canaille                  | 43.207   | 5.547     | FS301     | FJ869838       |
| ● <i>Dictyota spiralis</i>      | Steen F.                                   | Portugal: Algarve: Lagos: Praia da Dona Ana             | 37.091   | -8.669    | FS498     | JQ061079       |
| ● <i>Dictyota spiralis</i>      | De Clerck O.                               | France: Languedoc-Roussillon: Banyuls: Cap du Troc      | 42.481   | 3.143     | ODC1056   | GU255604       |
| ● <i>Dictyota spiralis</i>      | Draisma S.G.A.                             | Italy: Sicily: Giardini Naxos                           | 37.822   | 15.278    | SGAD1115  | GU255608       |
| ○ ● <i>Dictyota stolonifera</i> | Verbruggen H., Díaz R., Galanza C.         | Philippines: Luzon: Sorsogon: Bulusan: Dancalan         | 12.849   | 124.153   | HV819     | GQ425222       |
| ○ <i>Dictyota stolonifera</i>   | Lin S.M.                                   | Taiwan: Keelung City: Batouzi Harbor                    |          |           | D264      | GQ425118       |
| ○ ● <i>Dictyota stolonifera</i> | Pauly K.                                   | Tanzania: Zanzibar: Mnemba atoll                        | -5.838   | 39.392    | TZ0488    | JQ061082       |
|                                 |                                            |                                                         |          |           |           | (See Table S2) |
| ● <i>Dictyota stolonifera</i>   | Verbruggen H.                              | Egypt: Marsa Alam                                       | 25.069   | 34.904    | HV1831    | JQ061080       |
| ● <i>Dictyota stolonifera</i>   | Pauly K.                                   | Tanzania: Mtwara: Mikindani Bay                         | -10.198  | 40.144    | TZ0377    | JQ061081       |
| ○ <i>Dilophus fastigiatus</i>   | Goldberg N.                                | Australia: South Australia: Esperance Bay: Woody Island | -33.980  | 121.931   | D96       | (See Table S2) |
| ○ <i>Padina arborescens</i>     | GenBank                                    |                                                         |          |           |           | EU579996       |
| ○ <i>Padina arborescens</i>     | (See Ni-Ni-Win et al. 2010)                |                                                         |          |           |           | AB358939       |
| ○ <i>Padina arborescens</i>     | GenBank                                    |                                                         |          |           |           | AY430357       |
| ○ <i>Padina arborescens</i>     | (See Ni-Ni-Win et al. 2010)                |                                                         |          |           |           | AB358904       |
| ○ <i>Padina boergesenii</i>     | De Clerck O.                               | Hawaii: Oahu: Honolulu: Ala Moana                       | 21.285   | -157.850  | ODC890    | (See Table S2) |
| ○ <i>Padina crassa</i>          | (See Ni-Ni-Win et al. 2010)                |                                                         |          |           |           | AB358943       |
| ○ <i>Padina crassa</i>          | GenBank                                    |                                                         |          |           |           | AY430361       |
| ○ <i>Padina japonica</i>        | (See Ni-Ni-Win et al. 2010)                |                                                         |          |           |           | AB358942       |
| ○ <i>Padina japonica</i>        | GenBank                                    |                                                         |          |           |           | AY430360       |
| ○ <i>Padina japonica</i>        | (See Ni-Ni-Win et al. 2010)                |                                                         |          |           |           | AB358910       |
| ○ <i>Padina pavonica</i>        | GenBank                                    |                                                         |          |           |           | EU580000       |
| ○ <i>Padina pavonica</i>        | (See Silberfeld et al. 2010)               |                                                         |          |           |           | EU681454       |
| ○ <i>Padina pavonica</i>        | (See Silberfeld et al. 2010)               |                                                         |          |           |           | EU681498       |
| ○ <i>Padina pavonica</i>        | (See Silberfeld et al. 2010)               |                                                         |          |           |           | EU681649       |

| <b>Taxon</b>                   | <b>Collector</b>                   | <b>Locality</b>                                    | <b>Latitude</b> | <b>Longitude</b> | <b>Id number</b> | <b>Accession no.</b> |
|--------------------------------|------------------------------------|----------------------------------------------------|-----------------|------------------|------------------|----------------------|
| ○ <i>Padina pavonica</i>       | (See Bittner et al. 2008)          |                                                    |                 |                  |                  | EU579961             |
| ○ <i>Padina sanctae-crucis</i> | (See Ni-Ni-Win et al. 2010)        |                                                    |                 |                  |                  | AB489969             |
| ○ <i>Padina sanctae-crucis</i> | Lane C.E, Schneider C.W.           | Bermuda: St. George's Island: Whalebone Bay        | 32.365          | -64.713          | CL030305         | (See Table S2)       |
| ○ <i>Rugulopteryx okamurae</i> | Steen F., Hollants J., Verlaque M. | France: Languedoc-Roussillon: Lagune de Thau: Mèze | 43.421          | 3.607            | FS280            | (See Table S2)       |
| ○ <i>Rugulopteryx okamurae</i> | Hwang I.K.                         | South Korea: Haegeumgang                           | 34.733          | 128.634          | D194             | (See Table S2)       |
| ○ <i>Scoresbyella profunda</i> | Huisman J.                         | Australia: Western Australia: Geographe Bay        | -33.654         | 115.262          | DIC44            | (See Table S2)       |
| ○ <i>Spatoglossum crassum</i>  | GenBank                            |                                                    |                 |                  |                  | AY430355             |
| ○ <i>Spatoglossum crassum</i>  | GenBank                            |                                                    |                 |                  |                  | AY422679             |
| ○ <i>Spatoglossum asperum</i>  | GenBank                            |                                                    |                 |                  |                  | EU580003             |
| ○ <i>Spatoglossum asperum</i>  | GenBank                            |                                                    |                 |                  |                  | EU579964             |
