# Supplementary material for: Contrasting Geographical Distributions as a Result of Thermal Tolerance and Long-Distance Dispersal in Two Allegedly Widespread Tropical Brown Algae
Source: PubMed Central journal article supplement (PMC3266907; doi:10.1371/journal.pone.0030813), 2012-01-26
Supplement: pone.0030813.s004.pdf [file pone.0030813.s004.pdf]

**Table S2.** Genbank accession numbers of the sequences used in the concatenated alignment, including strain numbers and sequence length.

| Taxon                             | LSU      | cox1     | cox3     | nad1     | psbA     | rbcl     |
|-----------------------------------|----------|----------|----------|----------|----------|----------|
| <i>Canistrocarpus cervicornis</i> | JQ061091 |          |          | GQ425184 | GQ466069 | DQ472047 |
|                                   | D192     |          |          | D192     | TZ0714C  | HV711    |
|                                   | 1175 nt  |          |          | 717 nt   | 871 nt   | 1258 nt  |
| <i>Canistrocarpus crispatus</i>   | GQ425150 | GQ425137 | GQ425146 | GQ425176 | GU265787 | GQ425119 |
|                                   | HV721    | ODC1444  | ODC1444  | ODC1444  | ODC1545  | HV721    |
|                                   | 1171 nt  | 610 nt   | 648 nt   | 717 nt   | 870 nt   | 1220 nt  |
| <i>Dictyopteris delicatula</i>    |          |          |          |          | JQ061090 | EU579943 |
|                                   |          |          |          |          | FS851    |          |
|                                   |          |          |          |          | 889nt    | 1095nt   |
| <i>Dictyopteris divaricata</i>    |          |          |          |          | AY430343 | AY422676 |
|                                   |          |          |          |          |          |          |
|                                   |          |          |          |          | 870nt    | 1292nt   |
| <i>Dictyopteris latiuscula</i>    |          |          |          |          | AY430349 | AY422677 |
|                                   |          |          |          |          |          |          |
|                                   |          |          |          |          | 870nt    | 1292nt   |
| <i>Dictyopteris polypodioides</i> | DQ472097 | EU681404 | EU681445 |          | EU681639 | EU579932 |
|                                   | ODC1031  |          |          |          |          |          |
|                                   | 1272nt   | 639nt    | 656nt    |          | 864nt    | 1271nt   |
| <i>Dictyopteris prolifera</i>     |          |          |          |          | AY430346 | AY422678 |
|                                   |          |          |          |          |          |          |
|                                   |          |          |          |          | 870nt    | 1292nt   |
| <i>Dictyopteris undulata</i>      |          |          |          |          | AY430353 | AY430333 |
|                                   |          |          |          |          |          |          |
|                                   |          |          |          |          | 870nt    | 1292nt   |
| <i>Dictyota acutiloba</i>         | DQ472111 | GU290238 | GU290242 | GU290247 | EU395602 | DQ472056 |
|                                   | ODC888   | ODC888   | ODC888   | ODC888   | ODC888   | ODC888   |
|                                   | 1169 nt  | 605 nt   | 276 nt   | 717 nt   | 855 nt   | 1162 nt  |
| <i>Dictyota adnata</i>            | GQ425154 | GQ425134 |          | GQ425178 | GU265788 | GQ425106 |
|                                   | ODC1485  | SD712204 |          | ODC1485  | SD712204 | SD712204 |
|                                   | 1052 nt  | 548 nt   |          | 709 nt   | 866 nt   | 1234 nt  |
| <i>Dictyota bartayresiana</i>     | GQ425153 | GQ425129 |          | GQ425183 | GQ466071 | GQ425107 |
|                                   | DR7      | DR7      |          | ODC1513  | TZ0802C  | ODC1588  |
|                                   | 1098 nt  | 617 nt   |          | 717 nt   | 873 nt   | 1280 nt  |
| <i>Dictyota binghamiae</i>        | EF990193 |          |          |          | JQ061015 | JQ061120 |
|                                   | Lane     |          |          |          | HV1542   | HV1801   |
|                                   | 1174 nt  |          |          |          | 861 nt   | 1129 nt  |
| <i>Dictyota canaliculata</i>      | GQ425167 | GQ425132 |          | GQ425177 | GQ425190 | GQ425108 |
|                                   | SD712709 | ODC1477  |          | ODC1477  | ODC1477  | SD712709 |
|                                   | 1097 nt  | 642 nt   |          | 717 nt   | 824 nt   | 1277 nt  |
| <i>Dictyota cf. caribaea</i>      | DQ472116 | JQ061097 | JQ061107 | JQ061110 | EU395608 | DQ472061 |
|                                   | HV926    | HV926    | HV926    | HV926    | HV926    | HV926    |
|                                   | 1157 nt  | 633 nt   | 653 nt   | 717 nt   | 858 nt   | 1146 nt  |
| <i>Dictyota ceylanica</i>         | GQ425152 | GQ425122 | GQ425145 | GQ425175 | EU395607 | DQ472067 |
|                                   | HV214a   | HV214a   | ODC1442  | ODC1442  | HV214a   | HV214a   |
|                                   | 1167 nt  | 621 nt   | 657 nt   | 704 nt   | 858 nt   | 1250 nt  |
| <i>Dictyota ciliolata</i>         | GQ425156 | GQ425124 |          | GQ425173 | GQ425192 | GQ425109 |
|                                   | D191     | HV632    |          | D191     | D395     | D191     |
|                                   | 1174 nt  | 626 nt   |          | 717 nt   | 871 nt   | 1239 nt  |

| Taxon                         | LSU      | cox1     | cox3     | nad1     | psbA     | rbcl      |
|-------------------------------|----------|----------|----------|----------|----------|-----------|
| <i>Dictyota coriacea</i>      | DQ472109 | GU290234 |          | GU290251 | AY422612 | DQ472054  |
|                               | CSUF003  | CSUF003  |          | CSUF003  | WJ3      | CSUF003   |
|                               | 1162 nt  | 621 nt   |          | 717 nt   | 882 nt   | 1223 nt   |
| <i>Dictyota crenulata</i> #1  | GU290231 |          |          | GU290252 | GU265782 | GU290253  |
|                               | HV1074   |          |          | HV1074   | HV1074   | HV1074    |
|                               | 999 nt   |          |          | 717 nt   | 871 nt   | 1271 nt   |
| <i>Dictyota crenulata</i> #2  | JQ061092 | JQ061098 | JQ061108 | JQ061111 | JQ061018 | JQ061121  |
|                               | D504     | D319     | D319     | D319     | D319     | D504      |
|                               | 979 nt   | 634 nt   | 657 nt   | 717 nt   | 871 nt   | 1270 nt   |
| <i>Dictyota crenulata</i> #3  |          | JQ061099 |          | JQ061112 | JQ061055 |           |
|                               |          | DR27     |          | DR27     | DR27     |           |
|                               |          | 633 nt   |          | 717 nt   | 859 nt   |           |
| <i>Dictyota crenulata</i> #4  | JQ061093 | JQ061100 |          | JQ061113 | JQ061051 | JQ061122  |
|                               | D193     | D404     |          | D404     | D394     | D324      |
|                               | 1173 nt  | 617 nt   |          | 717 nt   | 871 nt   | 1199 nt   |
| <i>Dictyota cyanoloma</i>     | JQ061094 | JQ061101 |          | JQ061114 | GU255590 | JQ061123  |
|                               | D502     | D544     |          | D544     | D502     | D544      |
|                               | 1012 nt  | 600 nt   |          | 717 nt   | 871 nt   | 1275 nt   |
| <i>Dictyota cymatophila</i>   | GQ425162 | GQ425128 |          | GQ425179 | GQ425193 | GQ425111  |
|                               | D397     | D406     |          | D403     | D306     | D397      |
|                               | 1016 nt  | 622 nt   |          | 717 nt   | 872 nt   | 1135 nt   |
| <i>Dictyota dhofarensis</i>   | DQ472127 | JQ061102 |          | JQ061115 | JQ061037 | JQ061124  |
|                               | DHO0163  | DHO0163  |          | DHO0163  | DHO0163  | DHO0163   |
|                               | 1174 nt  | 603 nt   |          | 717 nt   | 752 nt   | 782 nt    |
| <i>Dictyota dichotoma</i>     | GQ425155 | GQ425131 | AY500368 | AY500368 | GU255542 | DQ472051  |
|                               | D190     | ODC1055  | GenBank  | Genbank  | ODC1689  | ODC1027   |
|                               | 1174 nt  | 645 nt   | 657 nt   | 717 nt   | 882 nt   | 1262 nt   |
| <i>Dictyota fasciola</i>      | GQ425166 | GQ425133 | GQ425143 | GQ425172 | FJ869847 | GQ425110  |
|                               | ODC1057  | ODC1065  | ODC1065  | ODC1065  | ODC1066  | ODC1065   |
|                               | 1137 nt  | 641 nt   | 654 nt   | 717 nt   | 871 nt   | 1287 nt   |
| <i>Dictyota friabilis</i>     | DQ472120 | GU290237 | GU290244 | GU290249 | GU265786 | DQ472064  |
|                               | ODC898   | DML67250 | ODC898   | ODC898   | HV153    | HV153     |
|                               | 1171 nt  | 536 nt   | 655 nt   | 717 nt   | 861 nt   | 1250 nt   |
| <i>Dictyota grossedentata</i> | JQ061095 | JQ061103 |          | JQ061116 | JQ061043 | JQ061125  |
|                               | TZ0490   | TZ0490   |          | TZ0490   | TZ0490   | TZ0490    |
|                               | 846 nt   | 641 nt   |          | 717 nt   | 861 nt   | 1293 nt   |
| <i>Dictyota hamifera</i>      | DQ472110 | GQ425123 | GQ425141 | GQ425169 | GQ425213 | GQ425112  |
|                               | HV222    | HV222    | HV222    | HV222    | HV222    | DML67438  |
|                               | 1171 nt  | 618 nt   | 656 nt   | 701 nt   | 857 nt   | 1257 nt   |
| <i>Dictyota humifusa</i>      | JQ061096 | JQ061104 |          | JQ061117 | JQ061046 | JQ061126  |
|                               | SD712460 | ODC1659  |          | ODC1659  | SD712460 | SD712066  |
|                               | 1023 nt  | 642 nt   |          | 701 nt   | 859 nt   | 1285 nt   |
| <i>Dictyota implexa</i>       | GQ425163 | GQ425135 | GQ425140 | GQ425168 | GQ466076 | GQ425116  |
|                               | ODC1238  | FS271    | LLGO249  | LLGO300  | ODC1238  | Kooistra1 |
|                               | 1173 nt  | 644 nt   | 656 nt   | 717 nt   | 874 nt   | 1252 nt   |
| <i>Dictyota intermedia</i>    | GQ425165 | GQ425127 |          |          | EU395615 | DQ472086  |
|                               | TC1      | TC1      |          |          | TC1      | TC1       |
|                               | 825 nt   | 607 nt   |          |          | 867 nt   | 1207 nt   |
| <i>Dictyota kunthii</i>       | GU290231 | GU290237 | GU290245 | GU290250 | EU395618 | DQ472057  |
|                               | D104     | D102     | D102     | D102     | D102     | D102      |
|                               | 1167 nt  | 598 nt   | 623 nt   | 717 nt   | 797 nt   | 1246 nt   |

| Taxon                        | LSU      | cox1     | cox3     | nad1     | psbA     | rbcl     |
|------------------------------|----------|----------|----------|----------|----------|----------|
| <i>Dictyota liturata</i>     | GQ425159 |          | GQ425144 | GQ425174 | GQ466075 | GQ425113 |
|                              | KZN2282  |          | HEC15721 | HEC15721 | HEC15816 | Sole1    |
|                              | 1174 nt  |          | 537 nt   | 717 nt   | 877 nt   | 1235 nt  |
| <i>Dictyota mediterranea</i> | GU290233 | GU290236 | GU290241 | GU290246 | GU255569 | GU290254 |
|                              | SGAD1116 | SGAD1116 | LLGO313  | LLGO224  | D653     | D595     |
|                              | 1172 nt  | 641 nt   | 653 nt   | 717 nt   | 861 nt   | 1247 nt  |
| <i>Dictyota mertensii</i>    | GQ425158 | GQ425130 |          | GQ425180 | GQ425215 | GQ425114 |
|                              | HV911    | DR31     |          | DR31     | DR31     | DR32     |
|                              | 1172 nt  | 607 nt   |          | 709 nt   | 831 nt   | 1079 nt  |
| <i>Dictyota naevosa</i>      | DQ472108 | JQ061105 | JQ061109 | JQ061118 | EU395609 | DQ472084 |
|                              | KZNB2345 | KZNB2345 | KZNB2345 | KZNB2345 | KZN2241  | KZN2241  |
|                              | 592 nt   | 600 nt   | 562 nt   | 714 nt   | 856 nt   | 1266 nt  |
| <i>Dictyota nigricans</i>    |          | JQ061106 |          | JQ061119 | JQ061068 | DQ472077 |
|                              |          | D92      |          | D92      | D92      | D92      |
|                              |          | 600 nt   |          | 717 nt   | 770 nt   | 1250 nt  |
| <i>Dictyota pinnatifida</i>  | GQ425157 | GQ425126 | GQ425142 | GQ425171 | EU395612 | GQ425115 |
|                              | CLO31302 | HV902    | HV932    | HV932    | HV902    | Sole3    |
|                              | 1166 nt  | 611 nt   | 619 nt   | 717 nt   | 868 nt   | 1239 nt  |
| <i>Dictyota rigida</i>       | GU290232 | GQ425138 |          | GQ425181 | GQ466077 | GQ425117 |
|                              | ODC1623  | ODC1657  |          | ODC1657  | ODC1657  | ODC1623  |
|                              | 1104 nt  | 605 nt   |          | 709 nt   | 861 nt   | 1275 nt  |
| <i>Dictyota sandvicensis</i> | DQ472118 | GU290239 | GU290241 | GU290248 | JQ061078 | DQ472063 |
|                              | ODC896   | ODC889   | ODC889   | ODC889   | ODC889   | ODC896   |
|                              | 1051 nt  | 604 nt   | 404 nt   | 709 nt   | 855 nt   | 1242 nt  |
| <i>Dictyota spiralis</i>     | GQ425161 | GU290235 |          |          | GQ466078 | DQ472074 |
|                              | ODC1225  | ODC1071  |          |          | HEC15815 | ODC1029  |
|                              | 1173 nt  | 635 nt   |          |          | 877 nt   | 1266 nt  |
| <i>Dictyota stolonifera</i>  | GQ425160 | GQ425139 |          | GQ425182 | GQ425222 | GQ425118 |
|                              | TZ0488   | TZ0488   |          | TZ0488   | HV819    | D264     |
|                              | 834 nt   | 598 nt   |          | 717 nt   | 870 nt   | 1266 nt  |
| <i>Dilophus fastigiatus</i>  | DQ472123 | GQ425125 |          | GQ425170 | EU395614 | DQ472068 |
|                              | D96      | D96      |          | D96      | D96      | D96      |
|                              | 1166 nt  | 518 nt   |          | 717 nt   | 855 nt   | 1263 nt  |
| <i>Padina arborescens</i>    | EU579996 |          | AB358939 |          | AY430357 | AB358904 |
|                              | 435nt    |          | 656nt    |          | 883nt    | 1237nt   |
| <i>Padina boergesenii</i>    | DQ472093 |          |          |          |          | DQ472037 |
|                              | ODC890   |          |          |          |          | ODC890   |
|                              | 1271nt   |          |          |          |          | 1182nt   |
| <i>Padina crassa</i>         |          |          | AB358943 |          | AY430361 |          |
|                              |          |          | 656nt    |          | 701nt    |          |
| <i>Padina japonica</i>       |          |          | AB358942 |          | AY430360 | AB358910 |
|                              |          |          | 656nt    |          | 701nt    | 1137nt   |
| <i>Padina pavonica</i>       | EU580000 |          | EU681454 | EU681498 | EU681649 | EU579961 |
|                              | 482nt    |          | 656nt    | 712nt    | 844nt    | 1193nt   |
| <i>Padina sanctae-crucis</i> | DQ472092 |          | AB489969 |          |          | DQ472036 |
|                              | CL030305 |          |          |          |          | CL030305 |
|                              | 990nt    |          | 656nt    |          |          | 884nt    |

| Taxon                        | LSU      | cox1     | cox3     | nad1     | psbA     | rbcL     |
|------------------------------|----------|----------|----------|----------|----------|----------|
| <i>Rugulopteryx okamurae</i> | GQ425149 | GQ425120 | GQ425147 | GQ425185 | AY748322 | AB096888 |
|                              | D194     | FS280    | FS280    | FS280    | D194     | D194     |
|                              | 1099 nt  | 612 nt   | 657 nt   | 717 nt   | 867 nt   | 1017 nt  |
| <i>Scoresbyella profunda</i> |          | GQ425121 | GQ425148 | GQ425186 | EU395620 |          |
|                              |          | DIC44    | DIC44    | DIC44    | DIC44    |          |
|                              |          | 607 nt   | 518 nt   | 498 nt   | 855 nt   |          |
| <i>Spatoglossum asperum</i>  | EU580003 |          |          |          |          | EU579964 |
|                              | 494nt    |          |          |          |          | 1193nt   |
| <i>Spatoglossum crassum</i>  |          |          |          |          | AY430355 | AY422679 |
|                              |          |          |          |          | 883nt    | 1292nt   |
